# Supplementary material for: COVID-19 Mortality Risk Assessment among Various Age Groups using Phylogenetic Analysis
Source: Preprints.org preprint supplement (doi:10.20944/preprints202009.0487.v1), 2020-09-21
Supplement: Supplementary file 1 [file README.docx]

**DATASET DETAILS**

The Supplementary datasets include all data used in the research work carried out by the genomics team.

Supplementary Tables: Includes 3 tables describing the data used to generate plots in the final paper (Figure 1-3)

Supplementary Material: The folder includes the original clinical data as well as the filtered data used for the analysis. The instructions to generate the filtered datasets have been provided as a part of the github repository. All codes used to run the analysis are also provided as a part of the repo <https://github.com/MountainMan12/GISAID_phylo>

The iToL annotation files are also provided which were used to generate annotations in iToL public project <http://itol.embl.de/shared/iTol_123>
