# Supplementary material for: COVID-19 Mortality Risk Assessment among Various Age Groups using Phylogenetic Analysis
Source: Preprints.org preprint supplement (doi:10.20944/preprints202009.0487.v1), 2020-09-21
Supplement: Supplementary file 2 [file Supplementary Tables.docx]

**Supplementary Table 1**: Data Assignment Used In Immunity Reaction Plot **(Figure 1)**

| **Initial** | **Assigned** |
| --- | --- |
| Alive | Best Reaction |
| Decease | Worst Reaction |
| Live | Best Reaction |
| Death | Worst Reaction |
| Home | Best Reaction |
| Recovered | Best Reaction |
| Released | Best Reaction |
| Cured | Best Reaction |
| Hospitalized | Mild Reaction |
| Quarantine | Best Reaction |
| Recovering | Best Reaction |
| Discharged | Best Reaction |
| Pneumonia | Mild Reaction |
| Isolation | Best Reaction |
| ICU | Worst Reaction |
| In patient | Mild Reaction |
| Outpatient | Best Reaction |
| Symptomatic | Mild Reaction |
| Symptoms indicative of upper respiratory infection | Mild Reaction |
| EPHAD | Mild Reaction |
| Bronchitis | Mild Reaction |
| DAMA | Mild Reaction |
| ICD-10 | Mild Reaction |
| Asymptomatic | Best Reaction |

**Supplementary Table 2:** Odds Ratio statistics calculated with <https://biopavlohrab.shinyapps.io/Odds_ratio_calculations/>

| **AGE RANGE** | **MEAN OR** | **MIN OR IN GROUP** | **MAX OR IN GROUP** |
| --- | --- | --- | --- |
| 1-10 | 1.271 | 1.030 | 1.549 |
| 11-20 | 1.313 | 1.131 | 1.399 |
| 21-30 | 1.290 | 1.145 | 1.379 |
| 31-40 | 1.462 | 1.328 | 1.589 |
| 41-50 | 1.662 | 1.586 | 1.749 |
| 51-60 | 1.972 | 1.822 | 2.179 |
| 61-70 | 2.465 | 2.271 | 2.670 |
| 71-80 | 2.846 | 2.564 | 3.357 |
| 81-90 | 8.977 | 4.216 | 19.729 |
| 91- 100 | 5.306 | 0.971 | 13.740 |

**Supplementary Table 3:** CFR calculations

| **Range(yrs)** | **Number of cases =**  **Np** | **Number of patients**  **deceased = Ndp** | **Case fatality rate (%) =**  **Ndp/Np x 100** |
| --- | --- | --- | --- |
| 1 - 10 | 56 | 0 | 0.00% |
| 11 - 20 | 162 | 4 | 2.46% |
| 21 - 30 | 513 | 4 | 0.78% |
| 31 - 40 | 646 | 10 | 1.55% |
| 41 - 50 | 651 | 43 | 6.60% |
| 51 - 60 | 629 | 73 | 11.6% |
| 61 - 70 | 477 | 67 | 14.0% |
| 71 - 80 | 286 | 61 | 21.3% |
| 81 - 90 | 147 | 29 | 19.7% |
| 91-100 | 41 | 11 | 26..8% |
