# Supplementary material for: COVID-19 Mortality Risk Assessment among Various Age Groups using Phylogenetic Analysis
Source: Preprints.org preprint supplement (doi:10.20944/preprints202009.0487.v1), 2020-09-21
Supplement: Supplementary file 3 [file Country vs Status_Inference.xlsx]

## Sheet: Sheet1
	High risk	Low risk
Japan	4	0
Italy	34	16
Hungary	13	5
Hongkong	19	22
Spain	66	59
Belgium	36	32
China	68	91
Turkey	80	19
Russia	128	14
Sri Lanka	1	3
India	228	361
Romania	28	18
Colombia	21	78
Lebanon	1	7
Mexico	7	9
Taiwan	34	20
France	63	94
Brazil	85	17
Singapore	108	10
Oman	16	41
Argentina	1	0
Bulgaria	1	0
Saudi Arabia	187	5
New zealand	1	0
Portugal	2	0
Australia	1	14
Senegal	22	57
Sweden	1	0
Algeria	2	1
Austria	15	1
Kuwait	1	2
Egypt	1	1
USA	55	105
DR Congo	3	1
Bangladesh	3	10
Poland	4	1
Canada	1	3
Ecuador	10	3
Vietnam	2	55
Indonesia	11	2
Israel	1	26
Kazakhstan	3	21
Croatia	2	5
Peru	2	0
Costa Rica	5	1
Myanmar	1	0
Germany	4	8
Gambia	5	2
Mongolia	1	0
Malaysia	45	8
Greece	7	2
Madagascar	2	0
Czech Republic	2	20
Georgia	3	1
Denmark	3	0
Nigeria	0	10
Morocco	0	5
Nepal	0	1
Cyprus	0	8
Bosnia and Herzegovina	0	1
Guam	0	2
Finland	0	1
Cambodia	0	1
Chile	1	0
	1451	1300
